# Supplementary material for: Fine-mapping and candidate gene analysis of qFF3.1 conferring fruit firmness in modern tomato variety
Source: Research Square preprint supplement (doi:10.21203/rs.3.rs-8303244/v1), 2025-12-20
Supplement: Supplementary file 1 [file a096138ce23035e85eaba6cd.xlsx]

## Sheet: Supplementary tables
Supplementary tables
Table S1 Primers used for QTL mapping
Table S2 Summary of quantitative trait loci (QTL) identified in the recombinant inbred line (RIL) population
Table S3 Summary statistics of sequencing and mapping for the parental and bulk segregant analysis (BSA) pools
Table S4 Annotation and variant information for 26 genes
Table S5 Summary statistics of RNA-seq data quality
Table S6 Primers used for qRT-PCR

## Sheet: Table S1
Table S1 Primers used for QTL mapping
Marker	Forward primer	Reverse primer	Physical position of SL4.0
I1-2	CTCATGTTGCATCTCAAGAATTGACT	CACAGCCTAATGCACAGGC	ch01:6473160
I1-6	CTTAAATAACAAGCATGTGCAGAAGC	CGCCTCAGCCTATTTTTCCAG	ch01:35135426
I1-11	GGTCAAGTTTGACAAAACAGTCTCC	CCTTCTGGTCCATGGTTTGTGT	ch01:65159720
IN1-1	GGTGAAACTTTTTCTTCCACTAAGC	TTGACGTCAGCCTCCGTC	ch01:68029045
IN1-2	GTAACTAAGATGGAGGATTGGAGGT	TGGGGATTAGATGCCCTCAAC	ch01:70744900
H1-1	GTGGTTTATTATTGATGGGATAGTGTGT	CGAACTAGAGAATGATATCTCAATTCAC	ch01:71366995
H1-2	GCCTCCACTAGCTAGTTAGATAGA	CTATAAACCTTCGGCCGAAGAAG	ch01:72816607
H1-3	AGATTCTCAATAATACACTTAAGAGGCCT	GTGCTCCAGTAGAAGGAAACTC	ch01:73191080
H1-4	TCAGGGATCGAGAGATATAAAACAAG	GAAGTTTTCAAAGTCATATAGGAAGCATC	ch01:74763299
H1-5	GTAATCTAAAACAAGAGAGAGAGAGTG	CTCGAAACGAGATGTGTGTATGT	ch01:74773206
H1-6	ACTGAATCAACCATTGAAAGGGTAC	CATATCTTCACACTAGCTCTGCC	ch01:74855429
H1-7	GAGAAGGGGCAATGACTTGG	CAAGAAATTGCCAGGTCAACCAT	ch01:75048347
H1-8	GCCATGCTTTGATTTATTCTCACC	GACGGATTTATTTTCTAGATTCTATCATTGC	ch01:76300048
H1-9	ACATTAATCGAAGGTAAACGAATAAC	AGATAGATACACGTGGGAAGAG	ch01:76325284
H1-10	CCTCCCCAATTCACCTTGAGT	TCCACTATACTCCATAAGCATCCT	ch01:77365975
H1-11	CCAAACGCCTAGCTTAAGATCT	CAAATATTCTATGCATGAATATCGAGT	ch01:77398995
IN1-4	GTGATATTAAACATGTCATGTGAAAAATTGAG	CTCCGTTCCATATTAGTGGTCTGT	ch01:78063965
IN1-5	CCGAACAATGCAATGGAGGT	CAGGCGCATATTAGTCGGT	ch01:84067496
I2-1	AAGCTTCGGATAAGTCACAATCT	GATGTTCAAAGGCATCAAGTTAGC	ch02:9910296
IN2-1	CGTATTCTTCCAAACACGACACT	GAGGCTAACACGTCATGATGGT	ch02:17083738
H2-1	GGCTTTACGACCTTAGGACTAC	ACGGCTTATTAGTGTGGGGTAG	ch02:27019317
H2-2	CGTTGTTTCAATACATGCAGTATGTG	CATGATAGATTATGGAACTTAAATAGCAT	ch02:32451578
H2-4	GCACAAGAATGGAGTTCACTGAT	AGGTTTGATTCTGTCAAGACAAC	ch02:35292713
H2-5	GCTCTTTCCGTTCTTAATTACTAGCC	CCTGAGCAATTTGAGGTTCTCG	ch02:36146494
H2-6	GAATATAGCGTCATGTCCACATCAG	GGCAGCGATGTCGAGATAGT	ch02:37292168
H2-7	GCATGCAAAGTCCGAAACC	GAATTCTGCACAATGAATGCCTAT	ch02:37383185
H2-8	GTATACGAGTGTTTGTAAAAGTTGATAGT	CCTCCAACAACTTCTTTTATCCTCT	ch02:37679520
H2-9	CTGTGGTGCGGATATCAAAGG	GGAATGGAGAACCAGAGACTATCATC	ch02:37704784
H2-10	CCCAAATCATGTGACTAATGTTTTACT	AGATAGGCTATTTTCGAAAAACTCTCG	ch02:38586706
H2-11	GACAGTAATGTAAGCCGTCTTCAC	TCACTGGCTTCTTATCCCATG	ch02:39825794
IN2-3	AGACGCCTAAAATAAAATTTTCGTTCAT	CAACACCTAAGGTAGTGTAAGCAG	ch02:43114675
IN2-2	AGAGAGGCGAGGGACAGT	GGAATATTTTCCGGTGGAGACAC	ch02:54570692
I2-5	GGGAAGGACTAAGATTAGTTTTGTCTAG	AGAGGACATCATAGAAATCAACGG	ch02:60035863
I3-1	GAGTTGTGTCAATCAACCCTCAT	TCACCTAAGTGAATAGTCACCT	ch03:11574268
I3-2	CTTACACTGAACTCGCATTCT	GTATTGGCAGTTTCTTCATGCCT	ch03:37442938
H3-1	CTAAACCCAATGGTGCACACAT	CGGTTTAATGCTTCGAGCATCT	ch03:49253324
H3-2	CTGATCTTACATCTATTCCCTCAAAGTC	GAGTCAAGTCAAAGAGCTTGCT	ch03:50885257
I3-3	GGAGGCTTCTTTATGGGTTCAT	GAGTCTCTGTAAGAAGCTTCACAAT	ch03:50885257
I3-4	GCCCTCCCAAACTATATCCGT	AAGGGAGAAATCATGCAGCT	ch03:54570692
I3-5	GCTGCTGTAGGTTACAGTAACGAT	AATTGGACTCGTTCCTTTGCT	ch03:57991001
H3-3	GCCGTCAACATTCAAGAGTAATGG	CATGTCCAACTGCGTGACT	ch03:60035863
I3-6	AAGTCAGCCTATTCACACTGAT	CACGGGGCTTCCAATTAAT	ch03:60035863
I3-7	CTAGACGATTAACAATTACGCC	GAGACAAATATGTTGTCGGT	ch03:60090103
I3-8	CCTTAATCATGCAACCGACAAT	CGGAATAAGCTACACTTGTCAT	ch03:60249830
I3-9	ACAACACTTCACTCTCAAGCTT	CCAGACTTCTTTTCACAGTT	ch03:60262606
I3-10	GAAGAAGCTTTTGATCTGTGGAAG	GTTGCTAAGCTTTCTGTTGTGT	ch03:60298869
I3-11	TCATCTCCGCTGGAAAACTAT	GTTTCTAGAGCCCAACTCGAT	ch03:60361341
I3-12	AACTTGGTGTCATCTCCTGGAT	TCTGTTGAAGCTCTCTGGGGTT	ch03:60385934
I3-13	GGGAGTAAGAGTCAGTTTGGAT	CGAGGAGCCAAACGAGTGTAT	ch03:60404225
I3-14	CCCAAGCTGTAAACTGTATT	GCAATGGGAGGATTCCCT	ch03:60472467
I3-15	GGATAGTACTATCTCACGATGT	TTGCAAGTGGGATCAACTTT	ch03:60579245
I3-16	CAACGAAAGTTGGGTTACCT	GCTCCTACCTGTCCCGTTAAG	ch03:60594919
I3-17	GAAAGGAAGAATCCCAGAGCAC	CCGCACAAAGTAGTCATGGT	ch03:60632695
I3-18	GTTCCTTGGGAGCAATAATGAT	TCTTGAGCGTTGTTGTTTGT	ch03:60733497
I3-19	CCACCAAACAACTTTCTTCCGT	AGAAATGTTTCTGGCGGTTGAT	ch03:60853049
I3-20	CAAGTTATGAGCTACAGAACAG	CACCAGCAACCTAGTATATCCT	ch03:60944630
I4-1	GTGTGTCATTCAATTAGGACATGAAG	GAGTTGAGATCACTTGATATGTCATGT	ch04:536859
H4-1	GCAGCTAATTTATCTGGTTGGGAT	CCAAACACACTCTTCGATTAAGT	ch04:1071638
H4-2	ATGTCTGATCCCAAAAATTGTAAG	GTCCATTAGTAATTTTGGTCCTTTAT	ch04:1603376
H4-3	CGCCGTTACCGTTGATCTG	TCAGTAAACTTTCTCAAGGCTGAC	ch04:2110353
H4-4	GGTGTACCGGTAGTAGTCTCTC	CCTCTATGACAAAGCATTGTCAAGG	ch04:2413408
H4-5	CCAGGAATGTGTTTCTGAGT	CCTTCAACATCGATTACTTATTTCC	ch04:2975564
IN4-1	GCTCAACAAGGTCAAGAAGTAGAT	CCTGGACGTGTTGAAAAATTTGCT	ch04:4238460
I4-5	ACGACCGTACCAAAATCCCT	CCTTGAGAAAATATCAGCTCGAAGT	ch04:21703494
I4-9	CGCAAATACACGTACAAATTTACATC	GGAGGTGGGTTTGGAATTTGG	ch04:53528128
IN4-3	ACCTTGCATTCTTCCTCTACATTG	CCTCATCTTCTAAATGAATGACGTC	ch04:55097093
IN4-4	GTTAATTCTATAGAGAGATGGATCAATGAT	CTATTCCGCTACTGTAGACAAGTC	ch04:56310823
IN4-5	CCACGTGTACTCATCAGAAAACCT	GGCTCCATCCTTTGTATCTCATGA	ch04:60994278
I4-13	CCATTTCCGACGAACCCAT	GACCCACAAAGGATTTTTGCTGT	ch04:60094734
I4-16	CTGAGATCTGAAAGAAAGAGGTGGAC	GGAATTATTTGAGTTCCAGGCCAATC	ch04:64315609
H5-2	CTTCTTCTTCAAAGTGCCCATC	CCTTTTACCTTCTTATGAACTTAAAGAG	ch05:1032080
H5-4	GTGTTTGTTACATTCTCAATCCA	GTGCTAATACTCGATTACAACAGAC	ch05:8450127
H5-5	CTTCTGCATTTTACCTTTGAGGT	CAGCTCTGATGAAGAAAAGAGC	ch05:9024194
H5-6	GTGTCTCACATCAAGTACAAAATGAC	GTGCATTTGATTGGCACATG	ch05:11660188
H5-7	CTTTCTTGGTTAAAGGTCATTAGT	TGTCGAACTCATAGTGACTTGTG	ch05:15469034
I5-1	AGGAACTAGGCATGTGGAAATT	AGGCTAAGTTTGTTATCTCACAACCT	ch05:19788136
I5-2	CTTCGTTAAGTCTAATCCTAGAAGT	GTGCATCAAGGATGGTTGAT	ch05:38915779
I5-3	GAGTTCAATTGCTAGTGTGCCT	TCGGCGGAATTCGTTGGT	ch05:45248742
I5-4	GTATGGGCTCTAACGTGAAAGT	ATGAAAGACGTTGGAGACTTCAAT	ch05:51714286
I5-5	TTCCGAAGGACATACAAAGTTC	GTTGCATTTAGTGCCTTAGCAT	ch05:56724600
I5-6	CATGATGATGTTTGAACAACTTGTC	GTGTGTCTGGGATGAAAAATAAT	ch05:58226582
I5-7	GTGCATCGGATTGCCTTTAGT	CGTCCCCTTACTCTGCAT	ch05:59205427
H5-8	TGAAGCTGAATTTAAGTTTGATCTCTCT	ACATATCCTCGTAACTATTGAAAATGG	ch05:59651205
H5-9	GTGTGAAATGATACTGTTCCTTACG	ACAAACAAGTTCTCTGTGGAACC	ch05:60868947
H5-10	GTGTTGGTATCGATACATTAGGTGT	CACAACCATTCAAAAAGCTTATCCT	ch05:61262839
H5-12	GGGAATTGTTTGATGTTTCTTCCCT	AGACCAGGAGCGTATCGTG	ch05:62174118
H5-13	CGATTTCAGCGTACTAAGAGAAAT	GACCCAACGAAATTGGTGGT	ch05:62889163
I5-8	GTACTTACCTGCCCTAACCTCT	GTTTTTGATTTTTTGTTCGTCGCT	ch05:65148419
I6-1	GCCTTTCGCTCGCATTTCAG	AGTTAGGTTATTGGTGTCATGTGC	ch06:116881
I6-6	TGGGAGAGAGATGCCTGGC	GTGGCTTTATAAGCCGTTGAGAAGT	ch06:22543923
I6-9	CCTATCTCTATTCTTCCATATCGAATGAC	GCACCTTGTGCTGACACATG	ch06:30687578
IN6-1	GTTGAGCTCTCGCATCGAT	GTGATACGGTGATACCTTATCTCCT	ch06:36552222
IN6-2	CCGTTAGACGAAAAGGATATACGTG	GATGGAGCAGCGTACTAAATGG	ch06:38731183
IN6-4	CGACAAGATCTCATGAGCTGG	GGACCGGTTATTGACGTGTC	ch06:40003460
I6-15	CGATTGGAGAACGGGTTAGT	GTGAGAGGTTATTATATATGTACACCTCG	ch06:42666208
I7-1	AGAGAGCGTTTTATTTTTTCACGTG	TCCAATTTTTTGTGAAACGAACTAGT	ch07:1754173
I7-15	GTGCCAAACGAGTCCCTT	GTATCAGTTGCAACGTATCAGACAATC	ch07:59644718
I7-18	GGCAAGAACTAGTAAGAATTGTGC	GATTCTGTTGGAAGCTGTCTTGC	ch07:67859008
I8-2	TGAGACGAGACTTCGATTCCT	CTACTCCCAAAAATATAACTCATGCTC	ch08:8235318
I8-7	AGGTGCGCTAGTTCACAAT	CCGACATTCCTCACAAGGT	ch08:35754433
H8-1	GCCACAATGGAATTGGGAATTG	GCCCAGACAAAAAGAAAGAAGTG	ch08:36947702
H8-2	ACGATGTATAATATGAGGGTGTTCCAT	GGTCTTCATGCTCACACATAGATC	ch08:38239710
H8-5	CATTTGTTCGTTTGGTCTTCTTCT	GGTATAATGTTGTATCTCCTCTGAAGT	ch08:47481089
I8-11	CTCAGTAATGTCAACGGATTCAGAT	GAGGTTTAGTGTTGGTTCGGGT	ch08:62229325
I9-2	CATTCAACTTTGAGTGCGTTCAC	CACAATGCTAATTGGACAGATTGT	ch09:162987
H9-1	GCCCAACCGAAGTAATCCAT	GATAGTGGGAGAGTGAAAAGTCG	ch09:772238
H9-2	CTTGTGATCGCGCTCATGAT	CCTAAGCATGTGCCCTAGTGAT	ch09:1727364
H9-3	CAAGCCCTTCAAACAGGAG	GGCAAAAATGATAAGCAATAACTTGAT	ch09:5289092
I9-3	GTTGTATGACTGCAAATCATTTCGT	GAAGAGAGAGAAAAGGATACTCCC	ch09:5831417
I9-12	CATTCTCGCACTCATTGTGATGG	CAACTAATATGGAACGGAGAGAGTGT	ch09:61975153
H9-6	CATCCTTAATACAAGCCCTCTTCC	CAAAGGTGGTTAGGATTAGTCCCTC	ch09:64040325
H9-7	CTTGCGGCTCACATAGCT	TCGCAAACTATTAGAGAATTTCACG	ch09:64706154
H9-8	GAATCGCTCCCCAACGATAG	GTCCCTTTTTAGAAATTGGACAGCC	ch09:67104930
I9-15	GGCACTAACTTTCCTAAAGTATGACG	GTAGTGAAGACGCCATGGATGT	ch09:67134952
I10-2	GTTGTTAAATGTATGTGGGACTTGT	ACTACAGCCACTTGATATTGCAAT	ch10:377796
H10-5	GCCGCCGATCATCTTTCC	CGTCTTTCAACCGAATCCATAACCT	ch10:1497411
H10-1	TGGCACTCTTGCGACTACT	AGGTTTAAGACTGCGATGCAC	ch10:6521346
H10-3	CTCTACAAATCCTTGACAAGCCTC	GAGGTCCGATTGGGATAGAAAGTAG	ch10:8103600
I10-6	CCAACCTGCATTAACTTGTTCATACT	GTTGACCTTTAATAATATGTTGTTTTTCTC	ch10:17036675
I10-11	CCACGGATAGATAGAGTTTGACAG	CACTTTGACTTGTCATTTTTTGATGC	ch10:50272270
H10-6	CGCTAGTCTCTCTCTATTCCCCT	TCTTAGCATTGTGTATAGACACTGC	ch10:56344967
H10-7	ATTCCTAACATTACTGGACACTGC	CCCATAGAACTCACTGAGCCT	ch10:58644040
H10-8	GGCCTATCTTCTCATTTGTCGATG	GCACTGAGAAAAAAGGATTTCAATAAGC	ch10:60219142
H10-9	GGCCTGCAAATCTTCAAAGTACAG	CACTGCGTAAAAAGCTAGCGA	ch10:63094491
I10-16	GTCGAGCACCTTCACTGC	CTTGGCGTGAATGCGAAG	ch10:63665443
I11-1	ATGTACAAATAGTTAGGGGAAGGGT	GTGGCTACAATTTCACGAATTGT	ch11:460384
H11-1	GGAGATCGATCCTATAGTTTAGAGGT	GGATGACTTGTGTATTAGTCCTCAC	ch11:3540914
H11-2	TCTGACCCCCTTCGACAG	ACCCAAAACACAGTGGCC	ch11:4871579
I11-6	CCTATTGTTTGTAAGGTAATCATTTGTAGT	GACTTGAAGTCAGGTGCATATTAG	ch11:20829703
I11-8	GAAAGCCAAGAGAAATGACTTAGT	CTAGATTCCTAATTGTGACAGAACTAG	ch11:30847694
I11-10	CACCAGATCACTGCTCTCAGTAG	CTCCTCCATTAGTGACTAGACTAGAGT	ch11:42221529
H11-8	GTGAAGCCCGACAAGTGAT	TCCACTCTTATATTGATGATGCATCT	ch11:50080031
H11-9	GATATGATAGACATAACTTTGTGTTCG	GTGTTCCATATCCTACAAATTAATGC	ch11:52933113
I11-14	GACCTCACGTGTGAAAATACACT	TCCCTTTTGTTGTGCCACCAT	ch11:53132154
I12-1	GCTCAACGTTATACTCTACGTCCT	GTGGGTATTAATGCAAAATGACCG	ch12:277116
H12-1	GCTGATATACTAATCTAATGCGCGAAAT	GCCCAATTTTGAGGCCCA	ch12:2992027
H12-2	GGACGAAGGAGATGGTGGT	GTGTGAATTGAGTCTCATCAATCACT	ch12:3085555
I12-5	GGAAGCTTTATTACCCAACGG	CGACCAAAACCAACTGATCTCG	ch12:26293013
I12-8	CTAATATATTCATCCCTAAAATAGACT	CGATCATTCAAGTCATCCTTGT	ch12:45548758
I12-11	CACAACTACGACGTGAACAGG	CCTGAAAGGGAAGTGCAGTC	ch12:58221540
H12-4	GGAATGCATAAACCCAACATCTAC	AGGTCCATGGTATAAGGGAATG	ch12:61410482
H12-5	GTTGAGTGTCGTCTCGTTATCC	GTAGGAACGATATCACAAATAATAAGGG	ch12:64177358
I12-14	GGTTCGAGTCTGTTTGAGTATGTAG	GGTGTGCCACATTGTTCCT	ch12:66110445

## Sheet: Table S2
Table S2 Summary of quantitative trait loci (QTL) identified in the recombinant inbred line (RIL) population
Phenotype name	Chromosome	Peak position_cM	Peak LOD	LOD significance threshold	Peak marker	Left marker	Right marker	Bayesian interval (cM)	PVE%	P value
Fruit firmness(N)	3	47.9056	7.02	3.41	I3-12	c3.loc38	c3.loc51	40 - 49 cM	11.1	1.13e-07
Fruit firmness(N)	4	72	6.57	3.41	IN4-4	c4.loc61	c4.loc82	65 - 79 cM	10.34	3.59e-07
Fruit firmness(N)	5	120	5.14	3.41	H5-9	c5.loc107	c5.loc123	112 - 122 cM	8.25	8.23e-06
Fruit shape index	1	26	4.87	3.74	H1-3	c1.loc23	c1.loc32	24 - 31 cM	7.86	1.53e-05
Fruit shape index	2	137	3.86	3.74	IN2-2	I2-1	c2.loc154	0 - 153 cM	6.28	0.000153
Fruit shape index	3	52	9.69	3.74	I3-19	I3-11	I3-20	49 - 52.6 cM	15.02	2.63e-10
Fruit shape index	4	73	3.95	3.74	IN4-4	c4.loc63	c4.loc88	62 - 87 cM	6.42	0.000125
Fruit shape index	8	0.910572	3.9	3.74	H8-2	I8-2	c8.loc14	0 - 12 cM	6.34	0.000139
Fruit shape index	11	76	4.19	3.74	I11-10	c11.loc69	c11.loc89	71 - 87 cM	6.79	7.24e-05
Fruit shape index	12	28.9792	7.05	3.74	H12-1	c12.loc19	c12.loc37	22 - 34 cM	11.18	1.06e-07
Fruit weight(g)	1	1	21.24	3.29	IN1-1	I1-2	c1.loc4	0 - 3 cM	29.93	0
Fruit weight(g)	5	124	5.35	3.29	H5-10	c5.loc121	c5.loc133	122 - 131 cM	8.57	5.13e-06
Fruit weight(g)	11	83	3.31	3.29	H11-8	c11.loc68	c11.loc97	70 - 94 cM	5.38	0.000538
Pericarp thickness(cm)	1	0.57284	12.44	4.57	I1-11	I1-2	c1.loc4	0 - 3 cM	18.68	4.97e-13
Pericarp thickness(cm)	11	80	4.83	4.57	H11-8	I11-10	c11.loc92	75 - 89 cM	7.72	1.66e-05
Pericarp area(cm2)	1	0.57284	8.39	8.03	I1-11	I1-2	c1.loc5	0 - 3 cM	13.02	5.03e-09

## Sheet: Table S3
Table S3 Summary statistics of sequencing and mapping for the parental and bulk segregant analysis (BSA) pools
Samples	Raw_Reads	Clean_Reads	Raw_Base(G)	Clean_Base(G)	Raw_Base(G)	Clean_Base(G)	Clean_Reads	Mapped_reads	Mapped_Rate	Mean_coverge	10X_coverage
CF-1	178485368	176374356	26.77	26.28	25.74	25.26	169610298	135120089	0.9951	25.40X	0.9585
MM	171275322	169176268	25.69	25.22	26.77	26.28	176374356	140286525	0.9984	26.50X	0.9799
Ruan	171597144	169610298	25.74	25.26	25.69	25.22	169176268	134922951	0.9972	25.46X	0.9742
Ying	180797182	178646872	27.12	26.6	27.12	26.6	178646872	142189677	0.997	26.77X	0.9696

## Sheet: Table S4
Table S4 Annotation and variants of 26 candidate genes
Gene ID	Position	Functional Predicition	Upstream	5'UTR	Exonic	Intron	3'UTR	Downstream
Solyc03g116500.4	SL4.0ch03:60356738..60361292 (+)	polygalacturonase (XOPG1)	16	0	3	3	0	6
Solyc03g116510.1	SL4.0ch03:60363255..60363536 (+)	DUF761 domain-containing protein	6	0	1	0	0	4
Solyc03g116520.1	SL4.0ch03:60364919..60365173 (+)	Unknown protein	2	0	1	0	0	19
Solyc03g116530.3	SL4.0ch03:60369311..60370616 (-)	Lactoylglutathione lyase / glyoxalase I family protein	21	0	0	0	1	28
Solyc03g116540.1	SL4.0ch03:60374697..60376190 (+)	Pentatricopeptide repeat-containing protein, mitochondrial	18	0	14	0	0	54
Solyc03g116550.4	SL4.0ch03:60378892..60381725 (+)	O-fucosyltransferase family protein	44	0	13	26	2	28
Solyc03g116560.1	SL4.0ch03:60383412..60385856 (-)	Pentatricopeptide repeat	43	0	10	0	0	28
Solyc03g116570.3	SL4.0ch03:60387059..60389383 (+)	Thiol-disulfide oxidoreductase DCC family protein	43	2	4	21	2	5
Solyc03g116580.4	SL4.0ch03:60389870..60392737 (-)	Pectin lyase-like superfamily protein	6	0	4	10	1	5
Solyc03g116590.3	SL4.0ch03:60394376..60396330 (-)	Embryo-specific protein	1	5	1	4	0	6
Solyc03g116600.3	SL4.0ch03:60396424..60400749 (-)	SNARE-like superfamily protein	22	3	0	10	0	1
Solyc03g116610.3	SL4.0ch03:60405516..60408701 (-)	Ethylene-responsive transcription factor WIN1	18	0	5	17	0	19
Solyc03g116620.3	SL4.0ch03:60414826..60418303 (+)	Phospholipase D	28	0	2	8	0	12
Solyc03g116625.1	SL4.0ch03:60418513..60419008 (+)	Unknown protein	2	0	2	3	0	16
Solyc03g116630.3	SL4.0ch03:60420503..60421689 (+)	cytochrome P450 family protein	16	0	0	0	1	20
Solyc03g116640.4	SL4.0ch03:60424940..60428700 (+)	DUF4050 family protein	3	0	0	3	0	8
Solyc03g116650.3	SL4.0ch03:60430185..60430805 (+)	EPIDERMAL PATTERNING FACTOR-like protein 8	6	0	0	0	0	0
Solyc03g116660.3	SL4.0ch03:60432161..60434913 (+)	transmembrane protein	20	0	2	9	2	9
Solyc03g116670.3	SL4.0ch03:60437411..60439685 (+)	Tetratricopeptide repeat (TPR)-like superfamily protein	14	0	0	7	0	6
Solyc03g116680.3	SL4.0ch03:60440851..60443639 (+)	Methyl-CpG-binding domain-containing protein 11	6	1	9	21	1	6
Solyc03g116690.3	SL4.0ch03:60444297..60445059 (+)	Umecyanin	4	0	0	1	0	7
Solyc03g116700.4	SL4.0ch03:60446722..60447613 (+)	Umecyanin	7	0	1	1	0	30
Solyc03g116710.3	SL4.0ch03:60454257..60455392 (-)	Protein LURP-one-related 5	42	5	2	1	1	13
Solyc03g116720.3	SL4.0ch03:60462387..60463123 (-)	Histidine-containing phosphotransfer protein 6	38	0	2	10	0	30
Solyc03g116730.4	SL4.0ch03:60471133..60473558 (-)	Palmitoyl-monogalactosyldiacylglycerol delta-7 desaturase, chloroplastic	14	0	4	4	1	25
Solyc03g116740.3	SL4.0ch03:60478998..60481881 (-)	Phosphatidylcholine:diacylglycerol cholinephosphotransferase 1	9	0	0	2	0	8

## Sheet: Table S5
Table S5 Summary statistics of RNA-seq data quality
Sample	Group	Raw Reads	Clean Reads	Clean Base(G)	Error Rate(%)	Q20(%)	Q30(%)	GC Content(%)
CF_BR_1	CF_BR	56527946	53124584	7.97	0.01	98.5	95.7	42.24
CF_BR_2	CF_BR	64455600	59734304	8.96	0.01	98.37	95.54	42.34
CF_BR_3	CF_BR	70577500	66506126	9.98	0.01	98.52	95.82	42.47
CF_MG_1	CF_MG	63008674	59163704	8.87	0.01	98.46	95.61	42.84
CF_MG_2	CF_MG	58357950	55181186	8.28	0.01	98.39	95.5	42.85
CF_MG_3	CF_MG	61122752	57167362	8.58	0.01	98.44	95.59	42.55
CF_OR_1	CF_OR	75350310	71110366	10.67	0.01	98.46	95.72	42.16
CF_OR_2	CF_OR	58545910	55481938	8.32	0.01	98.42	95.54	41.99
CF_OR_3	CF_OR	66859764	62928372	9.44	0.01	98.41	95.57	42.48
CF_RR_1	CF_RR	66514434	61994532	9.3	0.01	98.39	95.49	42.66
CF_RR_2	CF_RR	56893822	51197258	7.68	0.01	98.27	95.32	42.19
CF_RR_3	CF_RR	71412136	67220400	10.08	0.01	98.35	95.4	42.32
MM_BR_1	MM_BR	54263308	49590300	7.44	0.01	98.38	95.55	42.25
MM_BR_2	MM_BR	70488886	64590494	9.69	0.01	98.44	95.68	42.47
MM_BR_3	MM_BR	69813602	65499600	9.82	0.01	98.5	95.75	42.43
MM_MG_1	MM_MG	63730776	59056688	8.86	0.01	98.44	95.58	42.12
MM_MG_2	MM_MG	67970928	64302864	9.65	0.01	98.4	95.54	42.68
MM_MG_3	MM_MG	64947668	60945884	9.14	0.01	98.36	95.47	42.35
MM_OR_1	MM_OR	73584194	68600256	10.29	0.01	98.45	95.7	42
MM_OR_2	MM_OR	69310986	63579198	9.54	0.01	98.34	95.51	42.1
MM_OR_3	MM_OR	63524264	59757332	8.96	0.01	98.4	95.55	42.11
MM_RR_1	MM_RR	68001884	62427144	9.36	0.01	98.33	95.45	42.23
MM_RR_2	MM_RR	54978370	50958392	7.64	0.01	98.37	95.47	42.29
MM_RR_3	MM_RR	64106016	59644678	8.95	0.01	98.28	95.31	42.35

## Sheet: Table S6
Table S6 Primers used for qRT-PCR
Gene ID	Forward primer	Reverse primer
Solyc03g116500	GAGTCACTCTTACAGCTACTTCC	CACCTTTGACCGACAAGGAC
Solyc03g116530	CTGTAAGGAGGCCTGGATCATTC	CTTCTCCACCGCATCTATGCTC
Solyc03g116550	CGCTTCAACTGTGCGAAAGC	CACTCAGCTAATCTTCGTATGCTCC
Solyc03g116570	CTGTAACGCCTCCGTTTCATG	CCTCCATTACACAGGTTGCACAC
ACTIN	GGAGATTGAAACTGCCAGGAGCA	CTGCAGCTTCCATACCAATCATGG
SlFRG03	GGCTGAACTGGCTCCTACTC	TTTCGCAAGGTTACAAGCAC
